# Supplementary material for: Resilience Predicts Lower Anxiety and Depression and Greater Recovery after a Vicarious Trauma
Source: MDPI journal article supplement (doi:10.3390/ijerph182312608), 2021-11-30
Supplement: s1 [file s1]

## **Supplementary Material**

### **Brief Resilience Scale – French**

Merci de bien vouloir indiquer ce qui vous correspond le mieux à chaque question sur une échelle de 1 (pas du tout d'accord) à 5 (tout à fait d'accord)

1. J'ai tendance à rebondir rapidement après les moments difficiles.
2. J'ai du mal à me sortir d'événements stressants.
3. Je récupère rapidement après un événement stressant.
4. J'ai du mal à revenir à mon état normal quand quelque chose de négatif arrive.
5. Je surmonte habituellement les moments difficiles avec peu de difficultés.
6. J'ai tendance à mettre longtemps pour me remettre des échecs dans ma vie.
